# Supplementary material for: DNA Repair Inhibitors Potentiate Fractionated Radiotherapy More Than Single-Dose Radiotherapy in Breast Cancer Cells
Source: MDPI journal article supplement (doi:10.3390/cancers14153794), 2022-08-04
Supplement: s1 [file s1]

**A**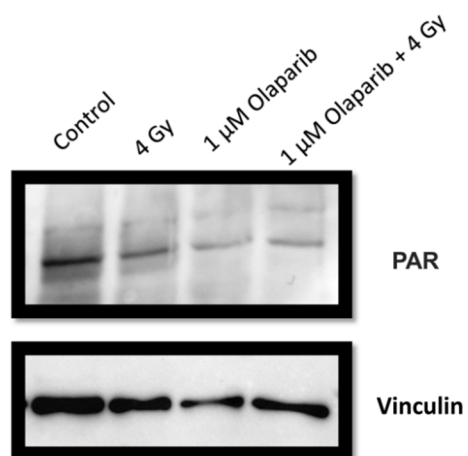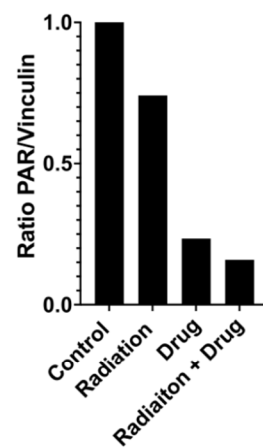**B**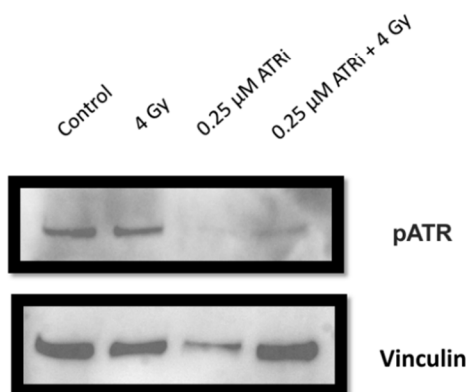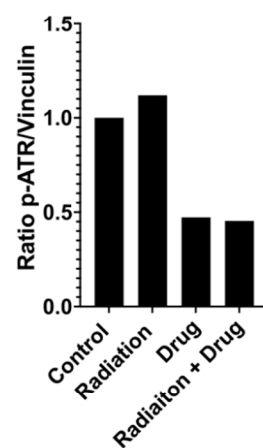**C**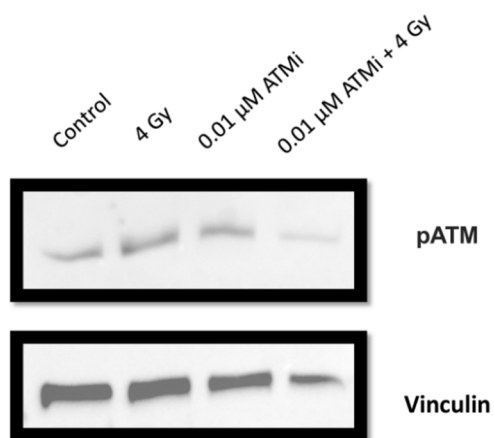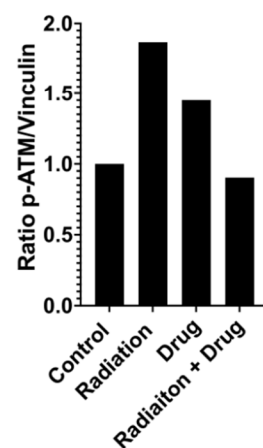

**Supplementary Figure S1.** Effect of AZD0156, AZD6738 and olaparib on target proteins of respective DNA repair pathways in MDA-MB-231 cells. (A) Olaparib directly affects the protein levels of PAR. (B) AZD6738, an ATR inhibitor, directly affects phosphorylation of ATR; while (C) AZD0156, an ATM inhibitor, directly affects phosphorylation of ATM. Phosphorylation or protein levels were evaluated for control cell populations only treated with DMSO, cells only treated with 4 Gy of radiation, cells only treated with DDR inhibitors, or cells treated with a combination of both. Levels of Vinculin were used as a loading control, and quantification was performed with ImageJ. Protein ratios were normalized to the untreated control cells.
