# Supplementary material for: DNA Repair Inhibitors Potentiate Fractionated Radiotherapy More Than Single-Dose Radiotherapy in Breast Cancer Cells
Source: Cancers (Basel). 2022 Aug 4;14(15):3794. doi: 10.3390/cancers14153794 (PMC9367425; doi:10.3390/cancers14153794)
Supplement: Supplementary file 1 [file cancers-14-03794-s001.zip › Supplementary Data.xlsx]

## Sheet: Figure 3
Single-dose IR
MDA-MB-231					MCF-7
Dose (Gy)	Mean surviving fraction	SD	N		Dose (Gy)	Mean surviving fraction	SD	N
0.5	0.9517	0.08002	3		0.5	0.78582	0.029972	3
1	0.836144	0.0543812	3		1	0.604429	0.0858026	3
2	0.573929	0.129584	3		2	0.374976	0.16624	3
4	0.25424	0.11994	3		4	0.0915595	0.0426471	3
8	0.00852416	0.00189525	3		8	0.00494722	0.00279322	3
24-hour fractionated IR
MDA-MB-231					MCF-7
Dose (Gy)	Mean surviving fraction	SD	N		Dose (Gy)	Mean surviving fraction	SD	N
1	0.8692	0.0528817	3		1	0.793345	0.125193	3
2	0.63981	0.0966962	3		2	0.525893	0.164338	3
4	0.480496	0.136456	3		4	0.371976	0.124597	3
6	0.252549	0.123153	3		6	0.217301	0.0899859	3
8	0.0727063	0.0400519	3		8	0.0604606	0.0513736	3
10	0.0208061	0.0172712	3		10	0.00989785	0.00812982	3

## Sheet: Figure 4
Same-day fractionation (2x 3 Gy)
MDA-MB-231					MCF-7
Interval (mins)	Mean surviving fraction	SD	N		Interval (mins)	Mean surviving fraction	SD	N
0	0.0576175	0.0657371	3		0	0.0910273	0.0100586	3
15	0.0859789	0.0663395	3		15	0.102523	0.013671	3
30	0.101968	0.0813144	3		30	0.11673	0.00517237	3
45	0.12433	0.085952	3		45	0.135896	0.0202501	3
60	0.166106	0.0742887	3		60	0.160944	0.0237959	3
120	0.172286	0.0834349	3		120	0.156102	0.023485	3
240	0.175571	0.114908	3		240	0.148527	0.01326	3

## Sheet: Figure 5
Single-dose IR only
MDA-MB-231					MCF-7
Dose (Gy)	Mean surviving fraction	SD	N		Dose (Gy)	Mean surviving fraction	SD	N
0.5	0.9517	0.08002	3		0.5	0.78582	0.029972	3
1	0.836144	0.0543812	3		1	0.604429	0.0858026	3
2	0.573929	0.129584	3		2	0.374976	0.16624	3
4	0.25424	0.11994	3		4	0.0915595	0.0426471	3
Single-dose IR + AZD0156 (0.01 µM)
MDA-MB-231					MCF-7
Dose (Gy)	Mean surviving fraction	SD	N		Dose (Gy)	Mean surviving fraction	SD	N
0.5	0.461747	0.0312722	3		0.5	0.851318	0.0145777	3
1	0.222482	0.00444098	3		1	0.625357	0.0754557	3
2	0.0355703	0.0278126	3		2	0.246069	0.0306291	3
4	0	0	3		4	0.0358352	0.012109	3
Single-dose IR + AZD6738 (0.25 µM)
MDA-MB-231					MCF-7
Dose (Gy)	Mean surviving fraction	SD	N		Dose (Gy)	Mean surviving fraction	SD	N
0.5	0.872181	0.0429974	3		0.5	0.706247	0.0573631	3
1	0.782032	0.118236	3		1	0.526044	0.109297	3
2	0.590856	0.00872332	3		2	0.211929	0.106873	3
4	0.302102	0.062501	3		4	0.0455454	0.00833405	3
Single-dose IR + olaparib (1 µM)
MDA-MB-231					MCF-7
Dose (Gy)	Mean surviving fraction	SD	N		Dose (Gy)	Mean surviving fraction	SD	N
0.5	0.895979	0.164439	3		0.5	0.764594	0.0590665	3
1	0.826284	0.253739	3		1	0.635291	0.0873919	3
2	0.657549	0.16135	3		2	0.310185	0.0161326	3
4	0.240191	0.0340737	3		4	0.0744713	0.0113346	3
Expected surviving fractions at 2 Gy
MDA-MB-231					MCF-7
DDR inhibitor	Expected surviving fraction	SD	N		DDR inhibitor	Mean surviving fraction	SD	N
AZD0156 (0.01 µM)	0.284525	0.100872	3		AZD0156 (0.01 µM)	0.3608	0.163604	3
AZD6738 (0.25 µM)	0.460866	0.123688	3		AZD6738 (0.25 µM)	0.190574	0.0962719	3
Olaparib (1 µM)	0.349004	0.117135	3		Olaparib (1 µM)	0.295924	0.137317	3

## Sheet: Figure 6
24-hour fractionated IR only
MDA-MB-231					MCF-7
Dose (Gy)	Mean surviving fraction	SD	N		Dose (Gy)	Mean surviving fraction	SD	N
1	0.8692	0.0528817	3		1	0.793345	0.125193	3
2	0.63981	0.0966962	3		2	0.525893	0.164338	3
4	0.480496	0.136456	3		4	0.371976	0.124597	3
6	0.252549	0.123153	3		6	0.217301	0.0899859	3
8	0.0727063	0.0400519			8	0.0604606	0.0513736	3
10	0.0208061	0.0172712			10	0.00989785	0.00812982	3
24-hour fractionated IR + AZD0156 (0.01 µM)
MDA-MB-231					MCF-7
Dose (Gy)	Mean surviving fraction	SD	N		Dose (Gy)	Mean surviving fraction	SD	N
1	0.254153	0.109347	3		1	0.545569	0.0458509	3
2	0.0489034	0.0234871	3		2	0.212175	0.0661408	3
4	0	0	3		4	0.0340941	0.0199361	3
6	0	0	3		6	0.0135205	0.0165258	3
8	0	0	3		8	0.00426747	0.00562664	3
24-hour fractionated IR + AZD6738 (0.25 µM)
MDA-MB-231					MCF-7
Dose (Gy)	Mean surviving fraction	SD	N		Dose (Gy)	Mean surviving fraction	SD	N
1	0.737471	0.0602273	3		1	0.637407	0.11772	3
2	0.59317	0.119986	3		2	0.21237	0.0145472	3
4	0.350534	0.0538718	3		4	0.0907552	0.0233861	3
6	0.141385	0.0744728	3		6	0.0409505	0.0275293	3
8	0.054527	0.0352139	3		8	0.00421549	0.00301533	3
24-hour fractionated IR + olaparib (1 µM)
MDA-MB-231					MCF-7
Dose (Gy)	Mean surviving fraction	SD	N		Dose (Gy)	Mean surviving fraction	SD	N
1	0.788127	0.12803	3		1	0.647564	0.0586569	3
2	0.507674	0.149854	3		2	0.328966	0.108113	3
4	0.192128	0.0757769	3		4	0.0931363	0.0241909	3
6	0.0532556	0.0384017	3		6	0.0363371	0.00369187	3
8	0.011171	0.010937	3		8	0.00836665	0.000838399	3

## Sheet: Figure 7
Single-dose IR only
MDA-MB-231					MCF-7
Dose (Gy)	Mean surviving fraction	SD	N		Dose (Gy)	Mean surviving fraction	SD	N
0.5	0.9517	0.08002	3		0.5	0.78582	0.029972	3
1	0.836144	0.0543812	3		1	0.604429	0.0858026	3
2	0.573929	0.129584	3		2	0.374976	0.16624	3
4	0.25424	0.11994	3		4	0.0915595	0.0426471	3
8	0.00852416	0.00189525	3		8	0.00494722	0.00279322	3
Single-dose IR + AZD0156 (0.01 µM)
MDA-MB-231					MCF-7
Dose (Gy)	Mean surviving fraction	SD	N		Dose (Gy)	Mean surviving fraction	SD	N
0.5	0.461747	0.0312722	3		0.5	0.851318	0.0145777	3
1	0.222482	0.00444098	3		1	0.625357	0.0754557	3
2	0.0355703	0.0278126	3		2	0.246069	0.0306291	3
4	0	0	3		4	0.0358352	0.012109	3
Single-dose IR + AZD6738 (0.25 µM)
MDA-MB-231					MCF-7
Dose (Gy)	Mean surviving fraction	SD	N		Dose (Gy)	Mean surviving fraction	SD	N
0.5	0.872181	0.0429974	3		0.5	0.706247	0.0573631	3
1	0.782032	0.118236	3		1	0.526044	0.109297	3
2	0.590856	0.00872332	3		2	0.211929	0.106873	3
4	0.302102	0.062501	3		4	0.0455454	0.00833405	3
Single-dose IR + olaparib (1 µM)
MDA-MB-231					MCF-7
Dose (Gy)	Mean surviving fraction	SD	N		Dose (Gy)	Mean surviving fraction	SD	N
0.5	0.895979	0.164439	3		0.5	0.764594	0.0590665	3
1	0.826284	0.253739	3		1	0.635291	0.0873919	3
2	0.657549	0.16135	3		2	0.310185	0.0161326	3
4	0.240191	0.0340737	3		4	0.0744713	0.0113346	3
24-hour fractionated IR only
MDA-MB-231					MCF-7
Dose (Gy)	Mean surviving fraction	SD	N		Dose (Gy)	Mean surviving fraction	SD	N
1	0.8692	0.0528817	3		1	0.793345	0.125193	3
2	0.63981	0.0966962	3		2	0.525893	0.164338	3
4	0.480496	0.136456	3		4	0.371976	0.124597	3
6	0.252549	0.123153	3		6	0.217301	0.0899859	3
8	0.0727063	0.0400519			8	0.0604606	0.0513736	3
10	0.0208061	0.0172712			10	0.00989785	0.00812982	3
24-hour fractionated IR + AZD0156 (0.01 µM)
MDA-MB-231					MCF-7
Dose (Gy)	Mean surviving fraction	SD	N		Dose (Gy)	Mean surviving fraction	SD	N
1	0.254153	0.109347	3		1	0.545569	0.0458509	3
2	0.0489034	0.0234871	3		2	0.212175	0.0661408	3
4	0	0	3		4	0.0340941	0.0199361	3
6	0	0	3		6	0.0135205	0.0165258	3
8	0	0	3		8	0.00426747	0.00562664	3
24-hour fractionated IR + AZD6738 (0.25 µM)
MDA-MB-231					MCF-7
Dose (Gy)	Mean surviving fraction	SD	N		Dose (Gy)	Mean surviving fraction	SD	N
1	0.737471	0.0602273	3		1	0.637407	0.11772	3
2	0.59317	0.119986	3		2	0.21237	0.0145472	3
4	0.350534	0.0538718	3		4	0.0907552	0.0233861	3
6	0.141385	0.0744728	3		6	0.0409505	0.0275293	3
8	0.054527	0.0352139	3		8	0.00421549	0.00301533	3
24-hour fractionated IR + olaparib (1 µM)
MDA-MB-231					MCF-7
Dose (Gy)	Mean surviving fraction	SD	N		Dose (Gy)	Mean surviving fraction	SD	N
1	0.788127	0.12803	3		1	0.647564	0.0586569	3
2	0.507674	0.149854	3		2	0.328966	0.108113	3
4	0.192128	0.0757769	3		4	0.0931363	0.0241909	3
6	0.0532556	0.0384017	3		6	0.0363371	0.00369187	3
8	0.011171	0.010937	3		8	0.00836665	0.000838399	3

## Sheet: Figure 8
IR only (2x 3 Gy)
MDA-MB-231					MCF-7
Interval (mins)	Mean surviving fraction	SD	N		Interval (mins)	Mean surviving fraction	SD	N
0	0.0576175	0.0657371	3		0	0.0910273	0.0100586	3
15	0.0859789	0.0663395	3		15	0.102523	0.013671	3
30	0.101968	0.0813144	3		30	0.11673	0.00517237	3
45	0.12433	0.085952	3		45	0.135896	0.0202501	3
60	0.166106	0.0742887	3		60	0.160944	0.0237959	3
120	0.172286	0.0834349	3		120	0.156102	0.023485	3
240	0.175571	0.114908	3		240	0.148527	0.01326	3
IR (2x 1.5/1 Gy) + AZD0156 (0.01 µM)
MDA-MB-231					MCF-7
Interval (mins)	Mean surviving fraction	SD	N		Interval (mins)	Mean surviving fraction	SD	N
0	0.0457266	0.0124042	3		0	0.0609958	0.00771839	3
15	0.0529338	0.0063057	3		15	0.0843182	0.0341959	3
30	0.0798612	0.0147766	3		30	0.0751846	0.000681318	3
45	0.0759421	0.0160781	3		45	0.102957	0.0317871	3
60	0.102204	0.0172573	3		60	0.108431	0.0408743	3
120	0.0885154	0.0292246	3		120	0.111229	0.0377054	3
240	0.0964409	0.00212614	3		240	0.115731	0.0309261	3
IR (2x 1.5 Gy)+ AZD6738 (0.25 µM)
MDA-MB-231					MCF-7
Interval (mins)	Mean surviving fraction	SD	N		Interval (mins)	Mean surviving fraction	SD	N
0	0.325293	0.0292608	3		0	0.0906841	0.0733002	3
15	0.463891	0.0214046	3		15	0.0968077	0.0420947	3
30	0.450516	0.041751	3		30	0.0696518	0.0249037	3
45	0.463007	0.0598359	3		45	0.0947152	0.0297448	3
60	0.331014	0.0305798	3		60	0.0813145	0.018222	3
120	0.375516	0.0182028	3		120	0.0901763	0.0457446	3
240	0.351506	0.0178887	3		240	0.130831	0.0436681	3
IR (2x 1.5 Gy) + Olaparib (1 µM)
MDA-MB-231					MCF-7
Interval (mins)	Mean surviving fraction	SD	N		Interval (mins)	Mean surviving fraction	SD	N
0	0.305895	0.0575734	3		0	0.113328	0.0381323	3
15	0.350385	0.0985307	3		15	0.125944	0.00829876	3
30	0.343639	0.106387	3		30	0.131749	0.0177488	3
45	0.335785	0.0818142	3		45	0.167333	0.0481042	3
60	0.396841	0.0855878	3		60	0.179657	0.0476384	3
120	0.402068	0.115513	3		120	0.163636	0.0369044	3
240	0.360451	0.0773037	3		240	0.20228	0.0434124	3

## Sheet: Figure 9
2 Gy IR only
MDA-MB-231					MCF-7
Hours after IR	Mean 53BP1 foci	SD	N		Hours after IR	Mean 53BP1 foci	SD	N
0.5	21.71	4.65276	2		0.5	21.44	2.06475	2
2	11.47	0.0989949	2		2	16.05	3.88909	2
6	9.15375	1.46194	2		6	8.21	0.0707107	2
24	3.39	0.127279	2		24	2.77333	0.691183	3
2 Gy IR + AZD0156 (0.01 µM)
MDA-MB-231					MCF-7
Hours after IR	Mean 53BP1 foci	SD	N		Hours after IR	Mean 53BP1 foci	SD	N
0.5	23.63	2.81428	2		0.5	18.44	3.12998	3
2	18.8	0.989949	2		2	16.93	1.62635	2
6	14.2991	0.451276	2		6	13.54	2.34759	2
24	20.52	5.82656	2		24	8.2	0.79196	2
2 Gy IR + AZD6738 (0.25 µM)
MDA-MB-231					MCF-7
Hours after IR	Mean 53BP1 foci	SD	N		Hours after IR	Mean 53BP1 foci	SD	N
0.5	30.6	1.21622	2		0.5	24.74	2.85671	2
2	17.56	0.905097	2		2	16.06	2.57387	2
6	7.89	0.890955	2		6	10.22	0.876812	2
24	9.29	2.84257	2		24	9.34667	0.590028	3
2 Gy IR + Olaparib (1 µM)
MDA-MB-231					MCF-7
Hours after IR	Mean 53BP1 foci	SD	N		Hours after IR	Mean 53BP1 foci	SD	N
0.5	21.44	3.4224	2		0.5	25.69	6.06698	2
2	24.72	3.22441	2		2	19.97	0.579828	2
6	11.5	1.01823	2		6	10.6	0.19799	2
24	7.88	2.29103	2		24	7.29	1.76777	2

## Sheet: Figure 11
Control (1 hr)										2 Gy (1 hr)
MDA-MB-231					MCF-7					MDA-MB-231					MCF-7
Cell cycle phase	Mean relative %	SD	N		Cell cycle phase	Mean relative %	SD	N		Cell cycle phase	Mean relative %	SD	N		Cell cycle phase	Mean relative %	SD	N
Sub-G1	0.211542	0.0932445	3		Sub-G1	0.310296	0.0239041	2		Sub-G1	0.985728	1.12701	3		Sub-G1	0.545306	0.400678	3
G1	42.8243	4.6349	3		G1	59.9847	0.576012	2		G1	43.4115	3.2976	3		G1	55.4827	5.05419	3
S	19.9542	3.84903	3		S	16.6668	6.0442	2		S	21.0737	1.79087	3		S	18.8732	7.70251	3
G2/M	37.0099	4.47838	3		G2/M	23.0382	5.49209	2		G2/M	34.5291	3.11325	3		G2/M	25.0988	4.90275	3
AZD0156 (0.01 µM) (1 hr)										2 Gy + AZD0156 (0.01 µM) (1 hr)
MDA-MB-231					MCF-7					MDA-MB-231					MCF-7
Cell cycle phase	Mean relative %	SD	N		Cell cycle phase	Mean relative %	SD	N		Cell cycle phase	Mean relative %	SD	N		Cell cycle phase	Mean relative %	SD	N
Sub-G1	0.831801	1.18855	3		Sub-G1	0.70872	0.589222	3		Sub-G1	0.874749	1.09623	3		Sub-G1	0.384788	0.249009	3
G1	42.0962	5.4475	3		G1	56.9494	3.58947	3		G1	41.8528	3.52906	3		G1	55.058	4.16132	3
S	20.3288	2.40605	3		S	18.7206	7.4031	3		S	21.0171	2.28528	3		S	16.5799	4.67678	3
G2/M	36.7432	3.58702	3		G2/M	23.6212	8.0165	3		G2/M	36.2553	2.18053	3		G2/M	27.9773	1.62482	3
AZD6738 (0.25 µM) (1 hr)										2 Gy + AZD6738 (0.25 µM) (1 hr)
MDA-MB-231					MCF-7					MDA-MB-231					MCF-7
Cell cycle phase	Mean relative %	SD	N		Cell cycle phase	Mean relative %	SD	N		Cell cycle phase	Mean relative %	SD	N		Cell cycle phase	Mean relative %	SD	N
Sub-G1	0.838377	1.07285	3		Sub-G1	0.530507	0.452797	3		Sub-G1	0.844962	0.999814	3		Sub-G1	0.387024	0.20522	3
G1	45.2973	4.65905	3		G1	56.6069	3.07981	3		G1	40.7986	3.35368	3		G1	55.5121	3.63479	3
S	19.3947	2.36285	3		S	17.8244	6.41965	3		S	20.3298	2.94664	3		S	17.6649	5.86197	3
G2/M	34.4696	3.10114	3		G2/M	25.0383	6.43846	3		G2/M	38.0266	1.7226	3		G2/M	26.436	3.45172	3
Olaparib (1 µM) (1 hr)										2 Gy + Olaparib (1 µM) (1 hr)
MDA-MB-231					MCF-7					MDA-MB-231					MCF-7
Cell cycle phase	Mean relative %	SD	N		Cell cycle phase	Mean relative %	SD	N		Cell cycle phase	Mean relative %	SD	N		Cell cycle phase	Mean relative %	SD	N
Sub-G1	1.01434	1.3781	3		Sub-G1	0.467988	0.348094	3		Sub-G1	0.864821	1.02124	3		Sub-G1	0.371243	0.250753	3
G1	42.6652	4.15602	3		G1	57.8709	3.02595	3		G1	42.1297	3.21104	3		G1	54.4546	3.58946	3
S	20.2713	2.52251	3		S	17.8888	6.84945	3		S	21.2687	2.39613	3		S	17.2468	5.29239	3
G2/M	36.0492	2.47919	3		G2/M	23.7723	7.04177	3		G2/M	35.7368	1.50078	3		G2/M	27.9274	2.43175	3
Control (24 hr)										2 Gy (24 hr)
MDA-MB-231					MCF-7					MDA-MB-231					MCF-7
Cell cycle phase	Mean relative %	SD	N		Cell cycle phase	Mean relative %	SD	N		Cell cycle phase	Mean relative %	SD	N		Cell cycle phase	Mean relative %	SD	N
Sub-G1	0.417678	0.0635154	2		Sub-G1	0.232946	0.100877	3		Sub-G1	1.02997	1.10284	3		Sub-G1	0.187299	0.190338	2
G1	53.4709	1.16412	2		G1	56.7506	2.24417	3		G1	40.9785	5.09313	3		G1	67.8104	0.588995	2
S	19.0928	1.71253	2		S	17.1752	7.28298	3		S	20.6962	6.03685	3		S	10.6074	2.32245	2
G2/M	27.0187	2.94017	2		G2/M	25.8413	5.00749	3		G2/M	37.2954	2.65824	3		G2/M	21.3949	2.72111	2
AZD0156 (0.01 µM) (24 hr)										2 Gy + AZD0156 (0.01 µM) (24 hr)
MDA-MB-231					MCF-7					MDA-MB-231					MCF-7
Cell cycle phase	Mean relative %	SD	N		Cell cycle phase	Mean relative %	SD	N		Cell cycle phase	Mean relative %	SD	N		Cell cycle phase	Mean relative %	SD	N
Sub-G1	0.376263	0.268884	3		Sub-G1	0.213337	0.18114	2		Sub-G1	1.99869	1.82558	3		Sub-G1	0.393469	0.420849	3
G1	50.1077	3.0845	3		G1	59.3497	1.39215	2		G1	40.3547	3.88581	3		G1	57.8837	4.12003	3
S	21.5014	5.14007	3		S	12.7361	3.62969	2		S	19.1284	3.76539	3		S	17.4577	10.4742	3
G2/M	28.0147	8.19593	3		G2/M	27.7009	2.05639	2		G2/M	38.5182	2.6307	3		G2/M	24.2652	7.06503	3
AZD6738 (0.25 µM) (24 hr)										2 Gy + AZD6738 (0.25 µM) (24 hr)
MDA-MB-231					MCF-7					MDA-MB-231					MCF-7
Cell cycle phase	Mean relative %	SD	N		Cell cycle phase	Mean relative %	SD	N		Cell cycle phase	Mean relative %	SD	N		Cell cycle phase	Mean relative %	SD	N
Sub-G1	0.298046	0.315521	2		Sub-G1	0.423146	0.208266	3		Sub-G1	1.08179	1.29535	2		Sub-G1	0.668258	0.406954	3
G1	58.1796	0.311284	2		G1	62.7003	1.40782	3		G1	42.6092	2.59546	2		G1	75.9201	4.35186	3
S	18.0522	0.586568	2		S	16.1564	9.50648	3		S	19.755	3.23897	2		S	6.53647	1.50558	3
G2/M	23.4701	0.0402368	2		G2/M	20.7201	9.04573	3		G2/M	36.554	0.651836	2		G2/M	16.8752	5.98203	3
Olaparib (1 µM) (24 hr)										2 Gy + Olaparib (1 µM) (24 hr)
MDA-MB-231					MCF-7					MDA-MB-231					MCF-7
Cell cycle phase	Mean relative %	SD	N		Cell cycle phase	Mean relative %	SD	N		Cell cycle phase	Mean relative %	SD	N		Cell cycle phase	Mean relative %	SD	N
Sub-G1	0.521934	0.508319	3		Sub-G1	0.274569	0.238409	2		Sub-G1	1.39712	1.06468	3		Sub-G1	0.406837	0.289134	3
G1	43.9521	2.16642	3		G1	57.6421	1.37106	2		G1	44.4914	6.70431	3		G1	66.298	1.81534	3
S	26.6217	9.28933	3		S	12.8246	3.50748	2		S	21.9382	2.54278	3		S	13.052	7.49928	3
G2/M	28.9042	10.095	3		G2/M	29.2588	4.64013	2		G2/M	32.1733	8.19416	3		G2/M	20.2432	6.00986	3
